# Supplementary material for: Quantifying the soil sink of atmospheric Hydrogen: a full year of field measurements from grassland and forest soils in the UK
Source: Copernicus journal article supplement (doi:10.5194/egusphere-2024-3654), 2024-12-12
Supplement: Supplementary file 1 [file egusphere-2024-3654-supplement.pdf]

# Quantifying the soil sink of atmospheric Hydrogen: a full year of field measurements from grassland and forest soils in the UK

## Supplementary Materials

**Table S1.** Meteorological equipment used to monitor environmental conditions at the flux measurement fields sites.

| Instrument                        | Manufacturer                       | Measurement                                                  | Height/Depth (m) |
|-----------------------------------|------------------------------------|--------------------------------------------------------------|------------------|
| <i>Easter Bush (grassland)</i>    |                                    |                                                              |                  |
| HMP60                             | Vaisala                            | Air temperature, relative humidity                           | 1.85             |
| Tipping bucket rain gauge         | Casella                            | Rainfall                                                     | 0.4              |
| CS655 water content reflectometer | Campbell Scientific                | Soil VWC, soil temperature                                   | 0.05, 0.10, 0.2  |
| <i>Glencorse (woodland)</i>       |                                    |                                                              |                  |
| WXT536 weather transmitter        | Vaisala                            | Air temperature, relative humidity, air pressure, wind speed | 2.3              |
| ARG100 tipping bucket rain gauge  | Environmental Measurements Limited | Rainfall                                                     | 0.34             |
| CS655 water content reflectometer | Campbell Scientific                | Soil VWC, soil temperature                                   | 0.05, 0.10, 0.15 |

9 **Table S2.** Summary statistics for H<sub>2</sub> flux (nmol m<sup>-2</sup> s<sup>-1</sup>) and deposition velocity (cm s<sup>-1</sup>) for each date  
 10 that chamber measurements were carried out at the Easter Bush (grassland) and Glencorse forest  
 11 (woodland) sites.

| Date             | Ambient H <sub>2</sub><br>(ppb) | Flux<br>Mean | Flux<br>Median | Flux<br>SD | Flux<br>Min | Flux<br>Max | VD<br>Mean | VD<br>SD |
|------------------|---------------------------------|--------------|----------------|------------|-------------|-------------|------------|----------|
| <i>Grassland</i> |                                 |              |                |            |             |             |            |          |
| 13/09/2023       | 463.1                           | -7.5         | -7.9           | 2.7        | -13.7       | -3.6        | 0.038      | 0.014    |
| 21/09/2023       | 484.0                           | -1.4         | -1.3           | 0.4        | -2.3        | -0.8        | 0.007      | 0.002    |
| 12/10/2023       | 478.3                           | -1.7         | -1.6           | 0.5        | -2.7        | -1.1        | 0.008      | 0.003    |
| 13/10/2023       | 520.9                           | -2.1         | -2.1           | 0.8        | -3.8        | -1.3        | 0.010      | 0.004    |
| 16/11/2023       | 453.4                           | -0.4         | -0.3           | 0.4        | -1.3        | 0.0         | 0.002      | 0.002    |
| 11/01/2024       | 552.8                           | -0.3         | -0.1           | 0.7        | -2.2        | 0.8         | 0.001      | 0.003    |
| 13/02/2024       | 511.6                           | -0.9         | -0.7           | 1.4        | -6.4        | 0.8         | 0.004      | 0.006    |
| 18/03/2024       | 534.9                           | -0.7         | -0.7           | 0.3        | -1.3        | 0.0         | 0.003      | 0.001    |
| 10/04/2024       | 524.8                           | -0.2         | -0.1           | 0.2        | -0.7        | 0.1         | 0.001      | 0.001    |
| 25/04/2024       | 542.4                           | -1.9         | -1.6           | 1.6        | -6.8        | 0.1         | 0.008      | 0.007    |
| 21/05/2024       | 494.4                           | -5.1         | -5.4           | 2.5        | -8.5        | -1.3        | 0.024      | 0.012    |
| 22/05/2024       | 526.9                           | -5.2         | -4.8           | 3.1        | -10.0       | -1.0        | 0.023      | 0.014    |
| 25/06/2024       | 566.5                           | -6.8         | -5.8           | 3.4        | -15.6       | -2.0        | 0.028      | 0.014    |
| 31/07/2024       | 459.2                           | -5.9         | -5.3           | 2.4        | -10.9       | -3.0        | 0.030      | 0.012    |
| 28/08/2024       | 488.2                           | -0.4         | -0.7           | 1.4        | -1.4        | 5.3         | 0.002      | 0.007    |
| 25/09/2024       | 495.9                           | -0.6         | -0.7           | 0.6        | -1.6        | 1.4         | 0.003      | 0.003    |
| All grassland    | 506.5                           | -2.6         | -1.2           | 3.1        | -15.5       | 5.3         | 0.012      | 0.015    |
| <i>Woodland</i>  |                                 |              |                |            |             |             |            |          |
| 11/09/2023       | 424.8                           | -20.5        | -23.6          | 9.4        | -34.2       | -4.1        | 0.114      | 0.052    |
| 12/09/2023       | 447.7                           | -22.4        | -22.3          | 4.0        | -29.3       | -16.0       | 0.118      | 0.021    |
| 01/11/2023       | 467.9                           | -16.1        | -14.7          | 5.5        | -28.7       | -5.6        | 0.079      | 0.027    |
| 28/11/2023       | 517.6                           | -13.6        | -16.2          | 7.4        | -27.8       | -1.1        | 0.060      | 0.033    |
| 02/02/2024       | 516.8                           | -17.0        | -18.7          | 6.5        | -25.2       | -4.8        | 0.075      | 0.029    |
| 21/02/2024       | 505.3                           | -14.8        | -15.5          | 8.8        | -29.9       | -4.2        | 0.067      | 0.040    |
| 04/04/2024       | 516.9                           | -16.7        | -15.7          | 6.2        | -27.4       | -5.6        | 0.074      | 0.027    |
| 17/04/2024       | 518.3                           | -16.9        | -17.2          | 7.8        | -35.8       | -4.7        | 0.075      | 0.034    |
| 16/05/2024       | 499.6                           | -23.2        | -24.0          | 8.0        | -40.7       | -4.1        | 0.109      | 0.038    |
| 11/06/2024       | 492.3                           | -18.3        | -19.5          | 8.0        | -39.2       | -5.3        | 0.086      | 0.038    |
| 11/07/2024       | 456.2                           | -15.5        | -16.5          | 5.8        | -31.0       | -3.1        | 0.079      | 0.030    |
| 07/08/2024       | 447.4                           | -23.9        | -23.0          | 4.3        | -33.2       | -17.6       | 0.126      | 0.022    |
| 04/09/2024       | 485.7                           | -16.2        | -17.2          | 7.7        | -33.6       | -5.0        | 0.033      | 0.016    |
| All woodland     | 484.6                           | -18.6        | -18.7          | 7.7        | -40.7       | -1.1        | 0.088      | 0.040    |

12

13

14 **Table S3.** A summary of coefficients of separate multiple regression models between H<sub>2</sub> flux with soil  
15 moisture and soil temperature.

| Site      | R <sup>2</sup> | Intercept | WFPS    | WFPS <sup>2</sup> | Soil T | Soil T <sup>2</sup> |
|-----------|----------------|-----------|---------|-------------------|--------|---------------------|
| Grassland | 0.60           | -28.05*** | 1.15*** | -0.0121***        | 0.02   | -0.002              |
| Woodland  | 0.14           | -15.22*   | 0.28    | -0.004            | -1.14  | 0.03                |

16 Significance codes: p < 0.001 \*\*\*, <0.01 \*\*, <0.1 \*

17

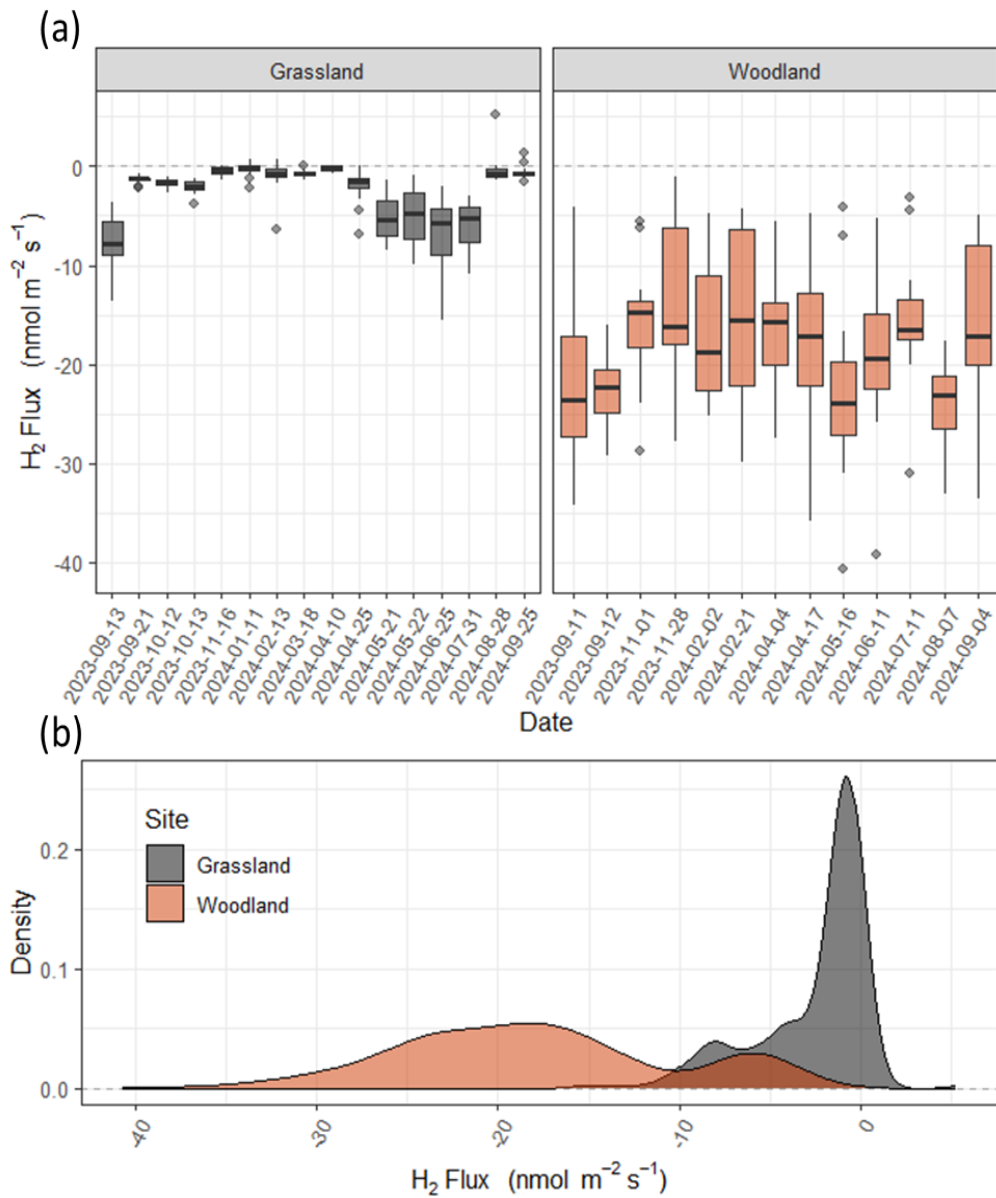

18

19 **Figure S1.** Deposition velocities of H<sub>2</sub> measured using the flux chamber method at grassland (Easter  
 20 Bush, grassland; grey) and forest (Glencorse Forest, woodland; red) sites in Midlothian, Scotland.  
 21 Boxplots (a) represent the median, and 25<sup>th</sup> and 75<sup>th</sup> percentiles of flux data of 20 chambers,  
 22 respectively (whiskers represent the 95<sup>th</sup> percentiles). (b) Frequency distributions of the flux data for  
 23 both sites (Flux presented in Figure 2).

24

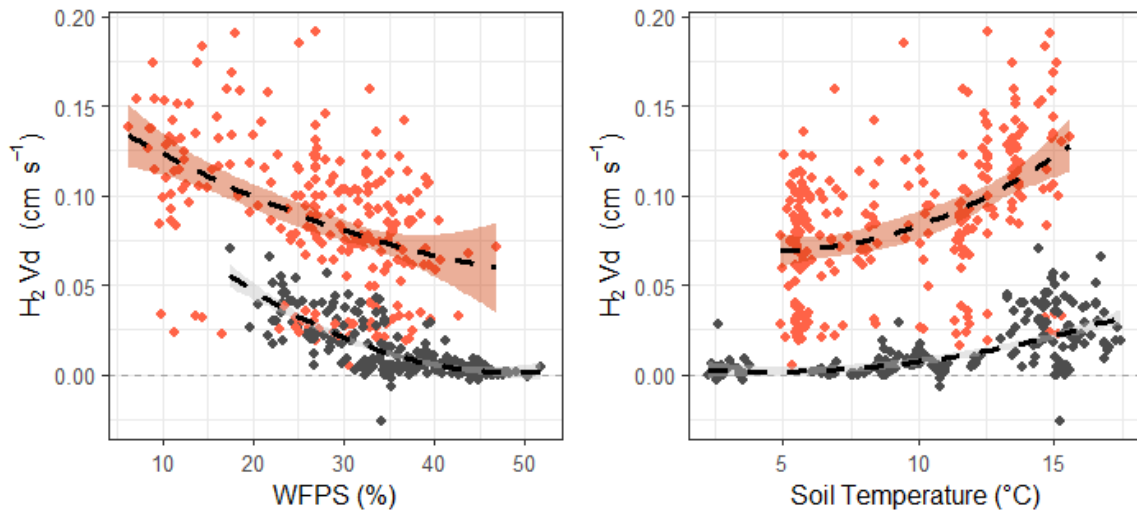

25

26 **Figure S2.** Correlations between H<sub>2</sub> Vd and water filled pore space (WFPS) and Soil Temperature. WFPS  
 27 and soil temperature measured at 10 cm depth via sampling probe. A 2nd order polynomial fit (black  
 28 dashed line) is included as a visual aid ( $y = a_1x^2 + a_2x + c$ ). Figure presented as Flux in Figure 3.

29

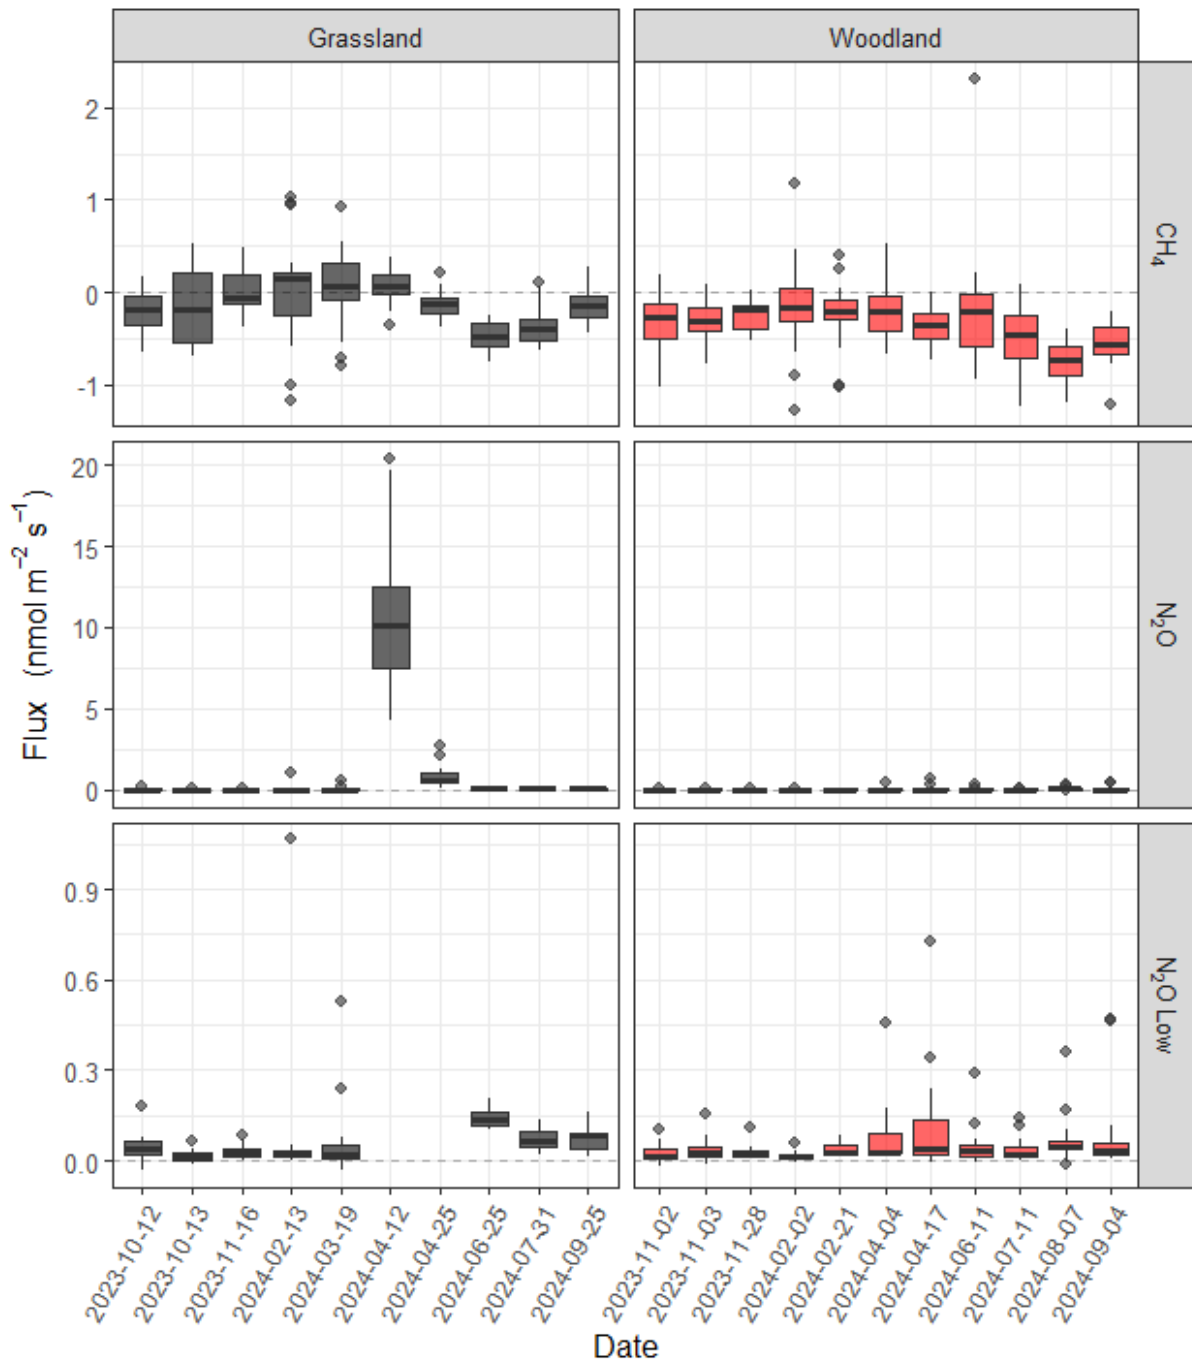

30

31 **Figure S3.** Fluxes of CH<sub>4</sub> and N<sub>2</sub>O measured using the flux chamber method at grassland (Easter Bush,  
 32 grassland) and forest (Glencorse Forest, woodland) sites in Midlothian, Scotland. Boxplots represent  
 33 the median, and 25th and 75th percentiles of flux data and whiskers represent the 95th percentiles.  
 34 N<sub>2</sub>O Low used to show scale of fluxes on dates excluding fertiliser induced peaks on 12/04/24 and  
 35 25/04/24.

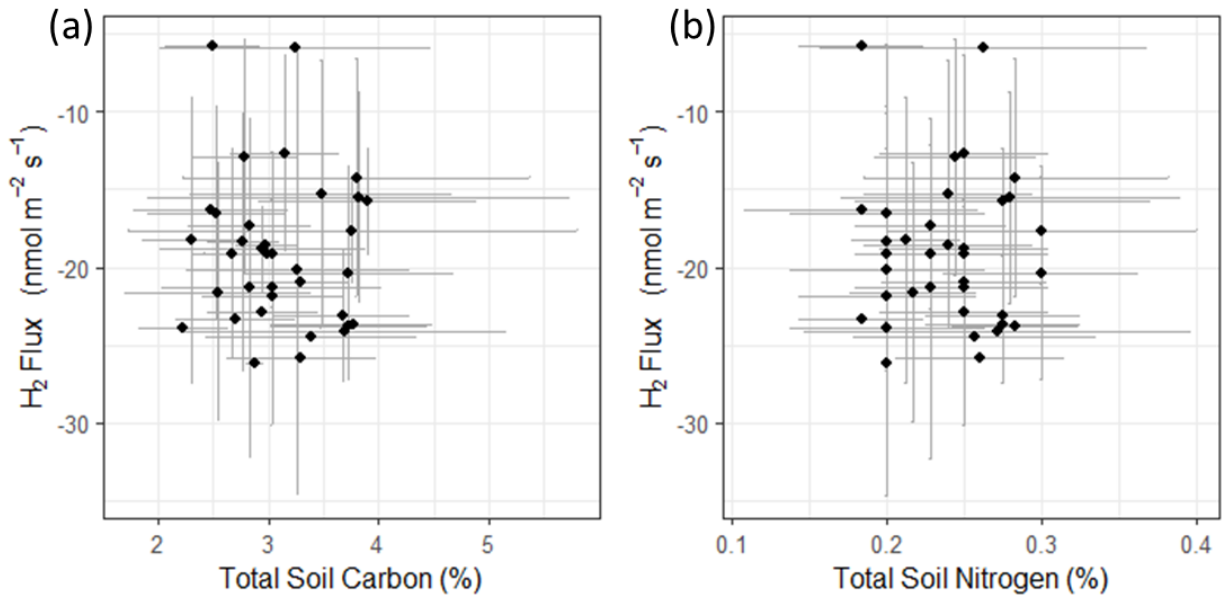

36

37 **Figure S4.** (a) Mean H<sub>2</sub> flux vs mean soil carbon measured from each chamber at the woodland site.

38 (b) Mean H<sub>2</sub> flux vs mean soil nitrogen measured from each chamber at the woodland site (95% C.Is.

39 included in all figures).

40
